# Supplementary material for: Retinal Ganglion Cell Diversity and Subtype Specification from Human Pluripotent Stem Cells
Source: PubMed Central journal article supplement (PMC5998302; doi:10.1016/j.stemcr.2018.02.010), 2018-03-22
Supplement: mmc1.pdf [file mmc1.pdf]

**Stem Cell Reports, Volume 10**

**Supplemental Information**

**Retinal Ganglion Cell Diversity and Subtype Specification from Human  
Pluripotent Stem Cells**

**Kirstin B. Langer, Sarah K. Ohlemacher, M. Joseph Phillips, Clarisse M. Fligor, Peng  
Jiang, David M. Gamm, and Jason S. Meyer**

| <b>Table S1: Major RGC Subtype Classes, their molecular makers, and their function</b> |                                        |                                                                        |
|----------------------------------------------------------------------------------------|----------------------------------------|------------------------------------------------------------------------|
| Retinal Ganglion Cell Subtype                                                          | Molecular Markers                      | Function                                                               |
| ON-OFF Direction Selective-RGCs                                                        | CART, CDH6, MMP17, DRD4, HB9, THRH, BD | Respond to preferred directional motion of bright and dark stimuli     |
| ON Direction Selective-RGCs                                                            | HOXD10, FSTL4                          | Respond to preferred directional motion of bright stimulus             |
| Alpha-RGCs                                                                             | SPP1, KCNG4, CB2, SMI32                | Differentially respond to bright and dark stimuli                      |
| Intrinsically photosensitive-RGCs                                                      | Melanopsin, TBR2                       | Respond to light to regulate circadian rhythms and pupillary reflex    |
| W3B-RGCs                                                                               | SDK2, TYW3                             | Respond to stimuli that fall within the center of the receptive field. |
| J-RGCs                                                                                 | JAMB                                   | Respond to directional movement of stimuli from soma-to-dendrite       |
| PV-RGCs                                                                                | PVALB                                  | Transient responses with small receptive fields and strong surrounds.  |

**Table S1:** This table indicates the major classes of RGC subtypes, previously identified molecular markers for each class, and their physiological function in the visual transmission. Related to Figures 3-7.

| <b>Table S2: Primary Antibody Information</b> |                         |                 |          |
|-----------------------------------------------|-------------------------|-----------------|----------|
| Primary Antibodies                            | Company                 | Catalog Number  | Dilution |
| BRN3                                          | Santa Cruz              | SC-15375        | 1:200    |
| $\beta$ III-Tubulin                           | Covance                 | PRB-435P/802001 | 1:1000   |
| CART                                          | Phoenix Pharmaceuticals | H-003-62        | 1:100    |
| CB2                                           | R&D Systems             | MAB3655         | 1:50     |
| CDH6                                          | Sigma-Aldrich           | HPA007047       | 1:100    |
| DCX                                           | Santa Cruz              | SC-271390       | 1:50     |
| FSTL4                                         | Novus                   | 91913           | 1:200    |
| HUC/D                                         | Molecular Probes        | A-21271         | 1:200    |
| ISLET1                                        | DSHB                    | 40.2D6          | 1:200    |
| MAP2                                          | Santa Cruz              | SC-20172        | 1:200    |
| MELANOPSIN                                    | ThermoScientific        | PA1-781         | 1:500    |
| SMI-32                                        | Calbiochem Millipore    | NE1023          | 1:500    |
| SPP1                                          | Abcam                   | Ab91655         | 1:50     |

**Table S2:** Antibodies used in this study, related to Figures 1, 3, 4, 5, and 7.

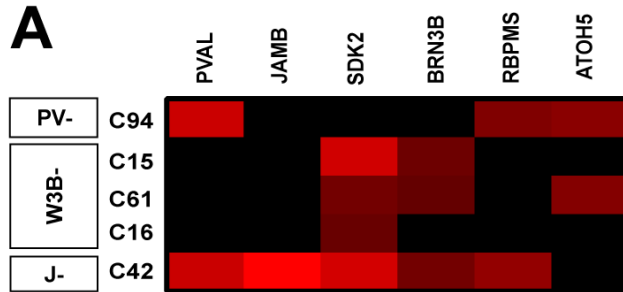

**Figure S1: Single cell qRT-PCR reveals expression of markers for other RGC subtypes.** A variety of other subtypes were characterized using single cell qRT-PCR. (A) PV-, W3B-, and J-RGCs were identified through the expression of PVALB, SDK2, and JAMB respectively, in addition to their combinatorial expression with a variety of other RGC-associated markers.

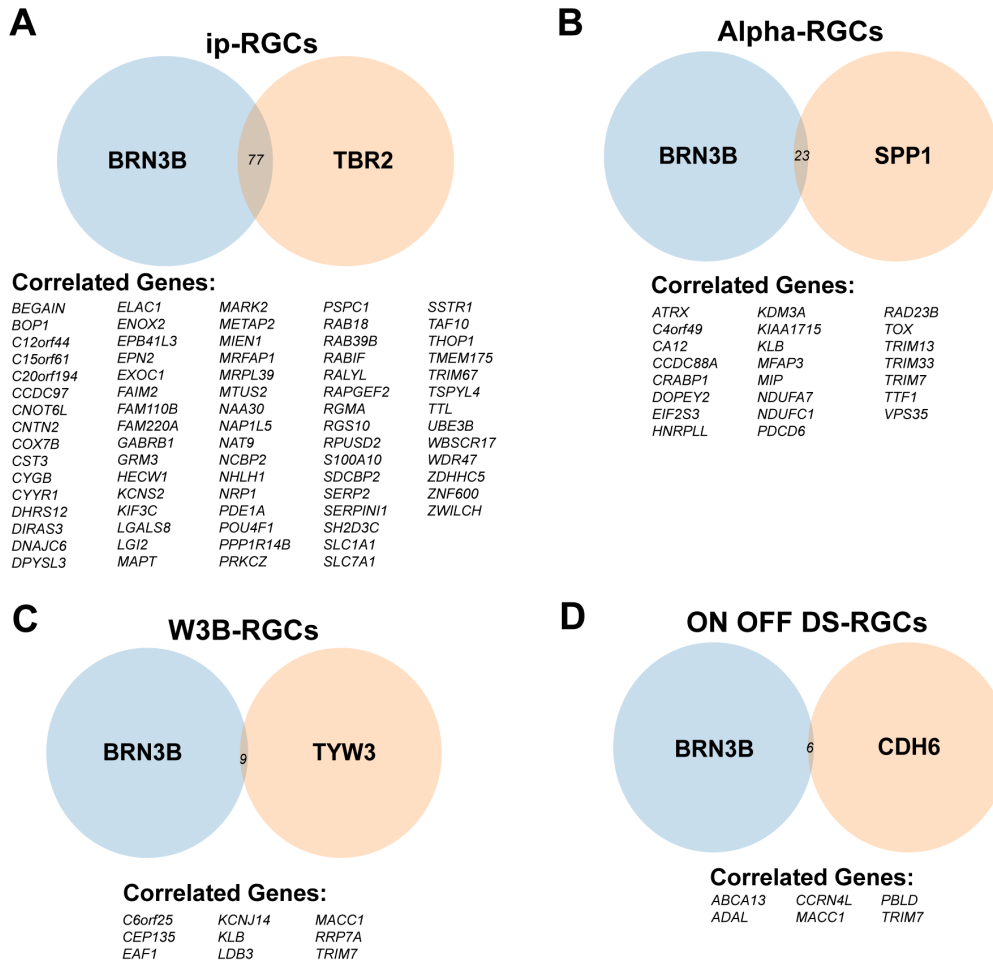

**Figure S2: Single cell RNA-seq analyses indicate correlative genes for major RGC subtype classes.** Single cell RNAseq analyses of numerous subtypes reveals closely correlated genes. (A-D) SRCCA for BRN3B using the top 1000 correlating genes was combined with SRCCA for subtype specific markers and revealed correlated genes. For ip-, Alpha-, W3B-, and ON OFF DS-RGCs 77, 23, 9, and 6 genes were found closely correlated within the top 1000 genes.
